# Supplementary material for: On the influence of the coherence length on the ionic conductivity in mechanochemically synthesized sodium-conducting halides, Na3−xIn1−xZrxCl6
Source: Royal Society of Chemistry journal article supplement (doi:10.1039/d3ta07209f), 2024-01-01
Supplement: d3ta07209f1.pdf [file d3ta07209f1.pdf]

## Supporting Information

-

### On the influence of the coherence length on the ionic conductivity in mechanochemically synthesized sodium-conducting halides,

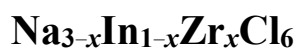

Tong Zhao,<sup>a,b</sup> Alexander N. Sobolev,<sup>a</sup> Xabier Martinez de Irujo Labalde,<sup>a</sup> Marvin A. Kraft,<sup>c</sup>  
Wolfgang G. Zeier<sup>\*a,c</sup>

<sup>a</sup>*Institute of Inorganic and Analytical Chemistry, University of Münster, Corrensstrasse  
28/30, 48149 Münster, Germany.*

<sup>b</sup>*International Graduate School of Battery Chemistry, Characterization, Analysis, Recycling  
and Application (BACCARA), University of Münster, 48149 Münster, Germany*

<sup>c</sup>*Institut für Energie- und Klimaforschung (IEK), IEK-12: Helmholtz-Institut Münster,  
Forschungszentrum Jülich, 48149 Münster, Germany.*

\*wzeier@uni-muenster.de

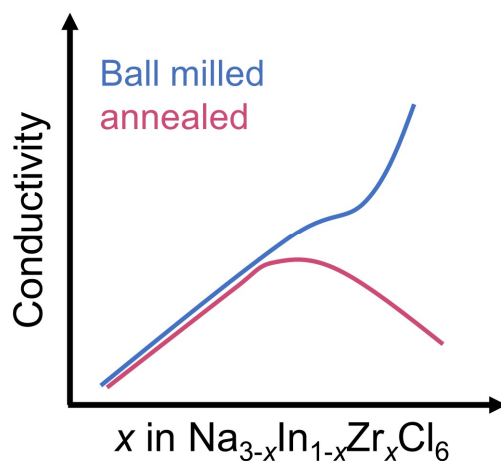

**Fig. S1.** Schematic of the differing trends of ionic conductivity against Zr content between ball milled and subsequently annealed  $\text{Na}_{3-x}\text{In}_{1-x}\text{Zr}_x\text{Cl}_6$ .

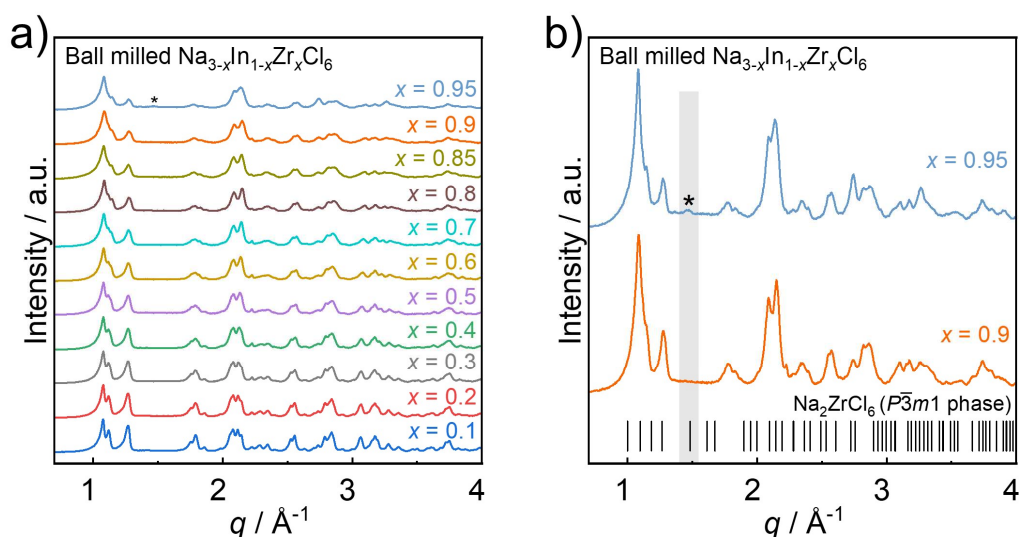

**Fig. S2.** **a)** X-ray diffraction patterns under  $\text{Ag K}\alpha_1$  radiation of the ball milled  $\text{Na}_{3-x}\text{In}_{1-x}\text{Zr}_x\text{Cl}_6$  series. **b)** Comparison of X-ray diffraction patterns of  $\text{Na}_{2.05}\text{In}_{0.05}\text{Zr}_{0.95}\text{Cl}_6$  and  $\text{Na}_{2.1}\text{In}_{0.1}\text{Zr}_{0.9}\text{Cl}_6$  with reflections of the trigonal phase of  $\text{Na}_2\text{ZrCl}_6$  (space group  $P\bar{3}m1$ ). The dominant additional side-phase reflection ( $\sim 1.47 \text{\AA}^{-1}$ ) is marked with an asterisk (\*).

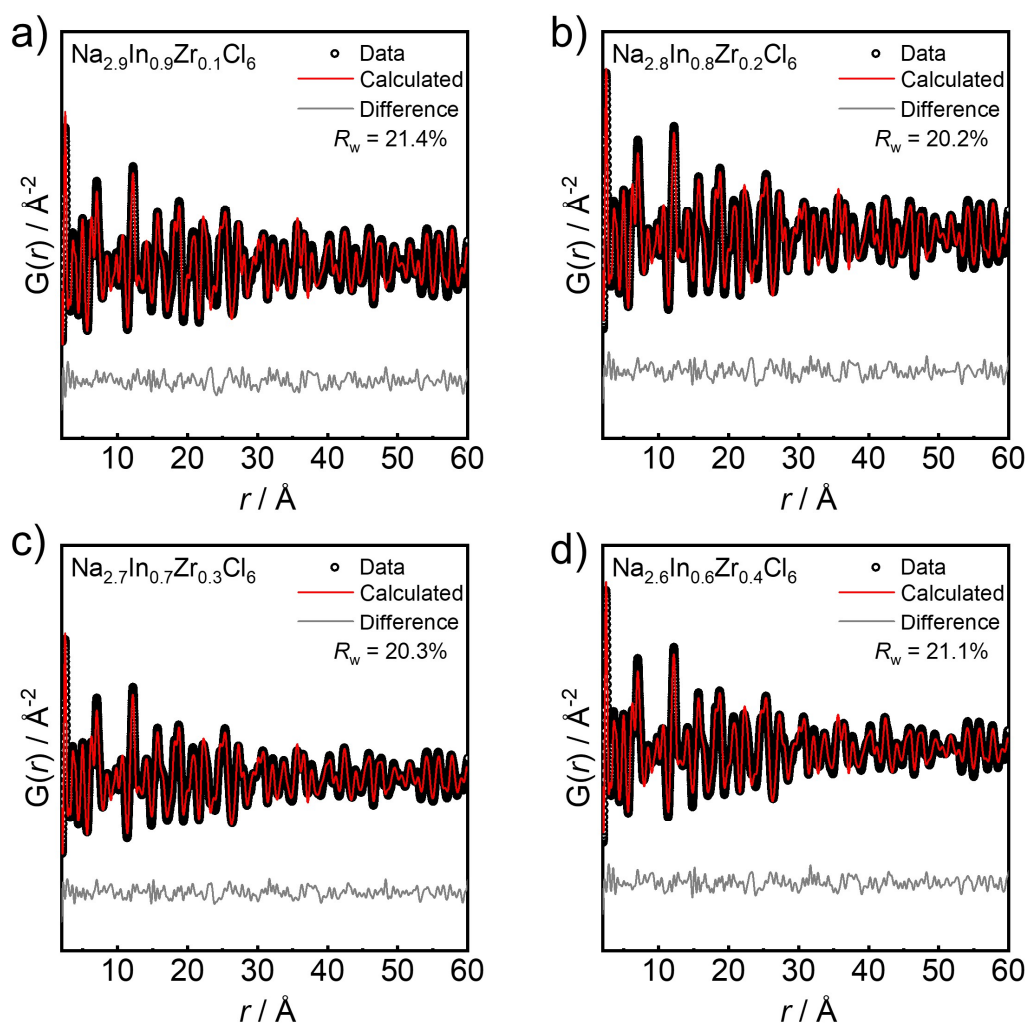

**Fig. S3.** Summary of pair distribution function fitting results of ball milled **a)**  $\text{Na}_{2.9}\text{In}_{0.9}\text{Zr}_{0.1}\text{Cl}_6$ , **b)**  $\text{Na}_{2.8}\text{In}_{0.8}\text{Zr}_{0.2}\text{Cl}_6$ , **c)**  $\text{Na}_{2.7}\text{In}_{0.7}\text{Zr}_{0.3}\text{Cl}_6$ , **d)**  $\text{Na}_{2.6}\text{In}_{0.6}\text{Zr}_{0.4}\text{Cl}_6$ .

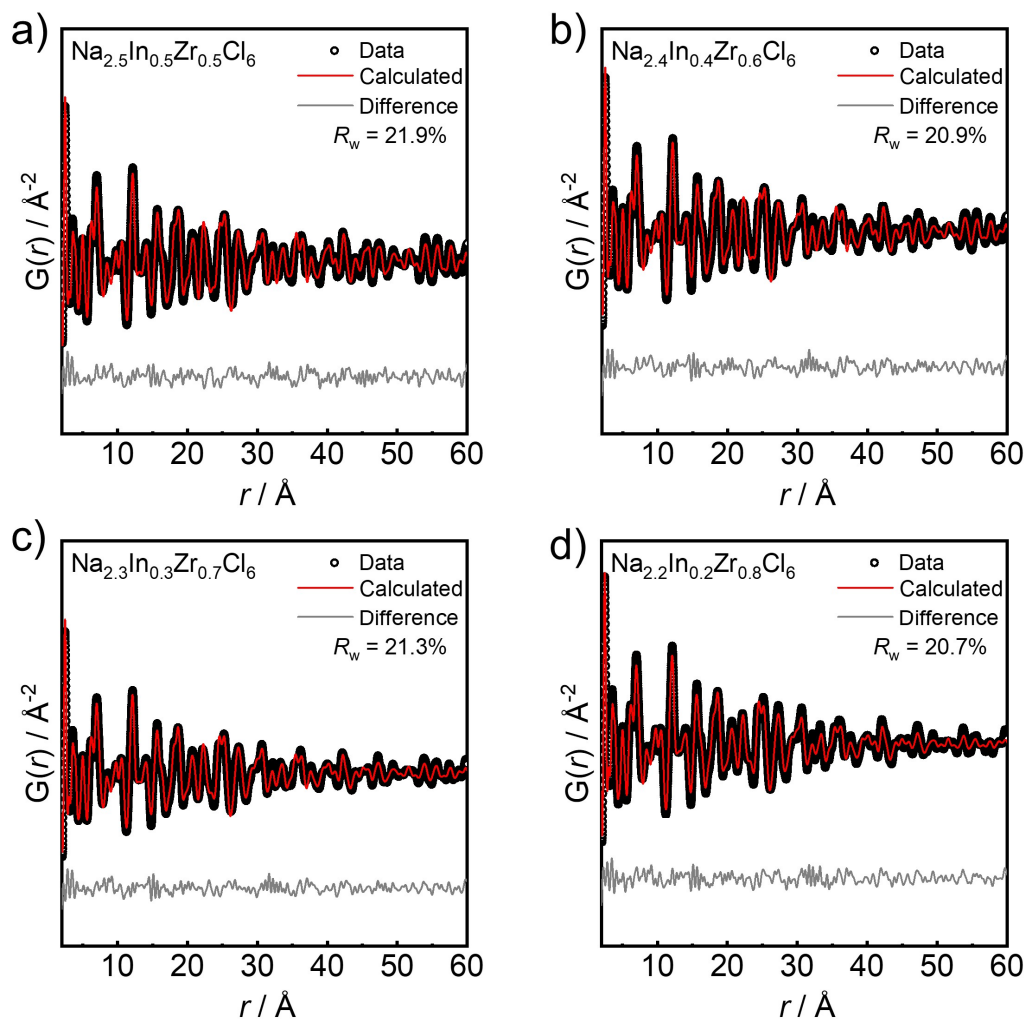

**Fig. S4.** Summary of pair distribution function fitting results of ball milled **a)**  $\text{Na}_{2.5}\text{In}_{0.5}\text{Zr}_{0.5}\text{Cl}_6$ , **b)**  $\text{Na}_{2.4}\text{In}_{0.4}\text{Zr}_{0.6}\text{Cl}_6$ , **c)**  $\text{Na}_{2.3}\text{In}_{0.3}\text{Zr}_{0.7}\text{Cl}_6$ , **d)**  $\text{Na}_{2.2}\text{Zr}_{0.2}\text{In}_{0.8}\text{Cl}_6$ .

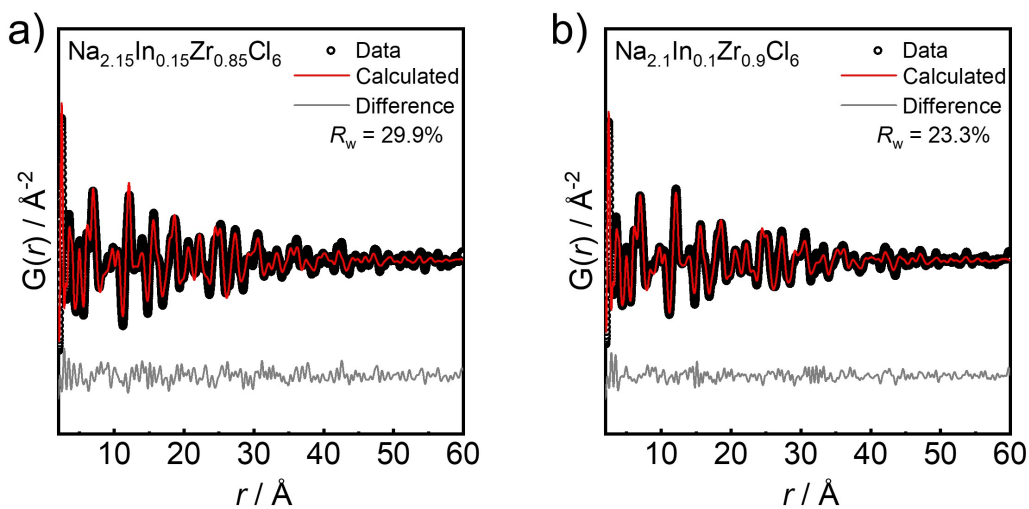

**Fig. S5.** Summary of pair distribution function fitting results of ball milled **a)**  $\text{Na}_{2.15}\text{In}_{0.15}\text{Zr}_{0.85}\text{Cl}_6$ ,

b)  $\text{Na}_{2.1}\text{In}_{0.1}\text{Zr}_{0.9}\text{Cl}_6$ .

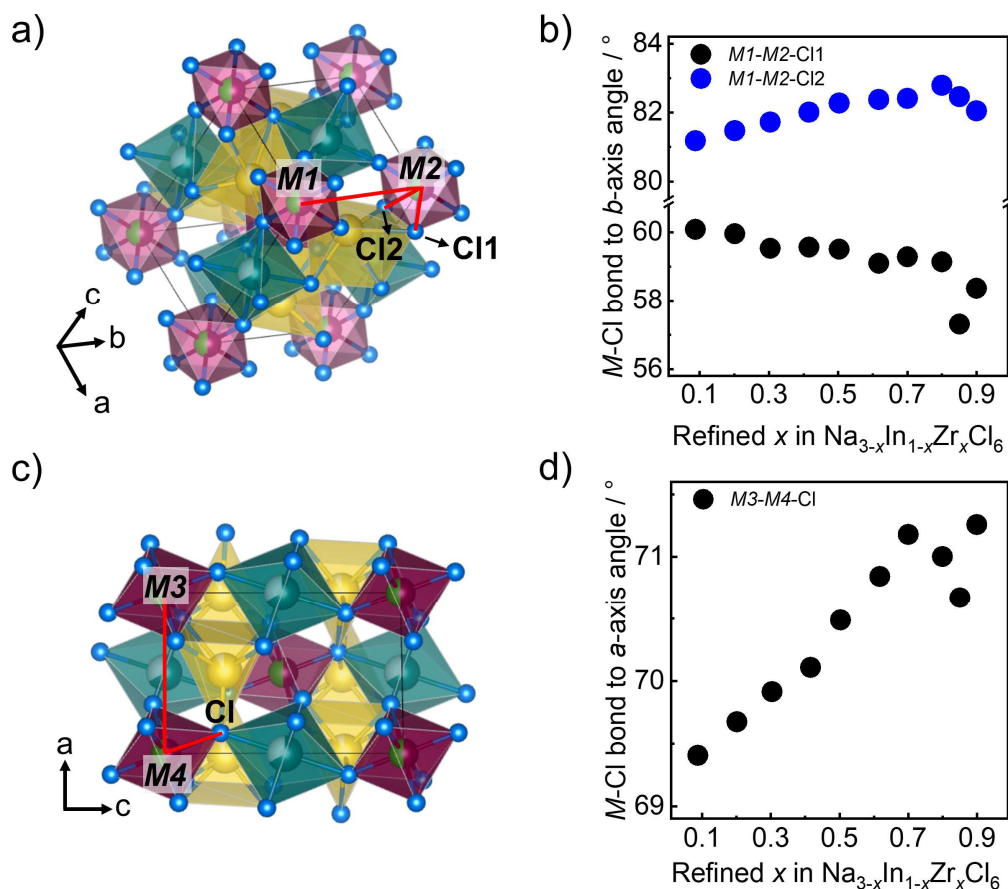

**Fig. S6.** *a)* Schematic of the angles between *b* axis (parallel to M1-M2 direction) and M-Cl bond (M, M1, M2 = In; Zr). *b)* Angles between the *b* axis and M-Cl bond as a function of refined Zr content. *c)* Schematic of the angles between *a* axis (parallel to M3-M4 direction) and M-Cl bond (M, M3, M4 = In; Zr). *d)* Angles between *a* axis and M-Cl bond as a function of refined Zr content.

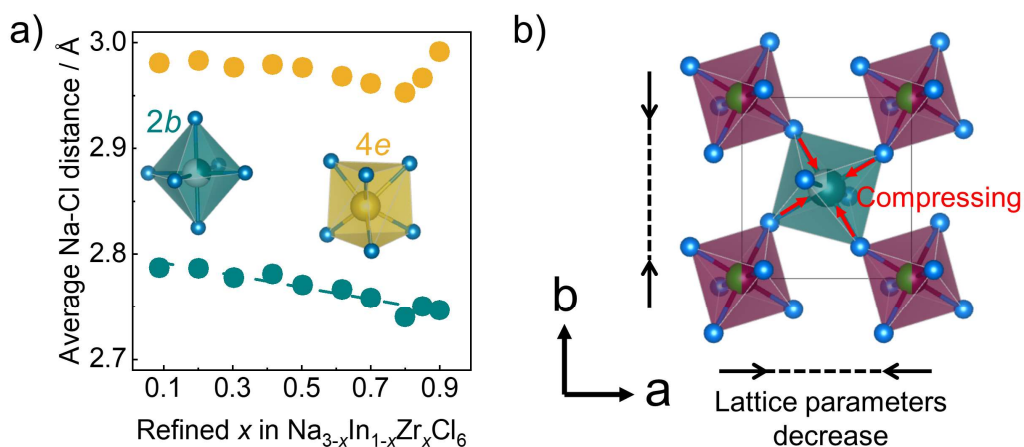

**Fig. S7.** *a)* Average Na-Cl distances of  $\text{NaCl}_6^{5-}$  octahedra ( $\text{Na}^+$  at Wyckoff *2b* site) and prism ( $\text{Na}^+$  at Wyckoff *4e* site). Dashed lines correspond to linear behavior as guides-to-the-eye. *b)* Schematics of  $\text{NaCl}_6^{5-}$  octahedra compressing upon decreased lattice parameters.

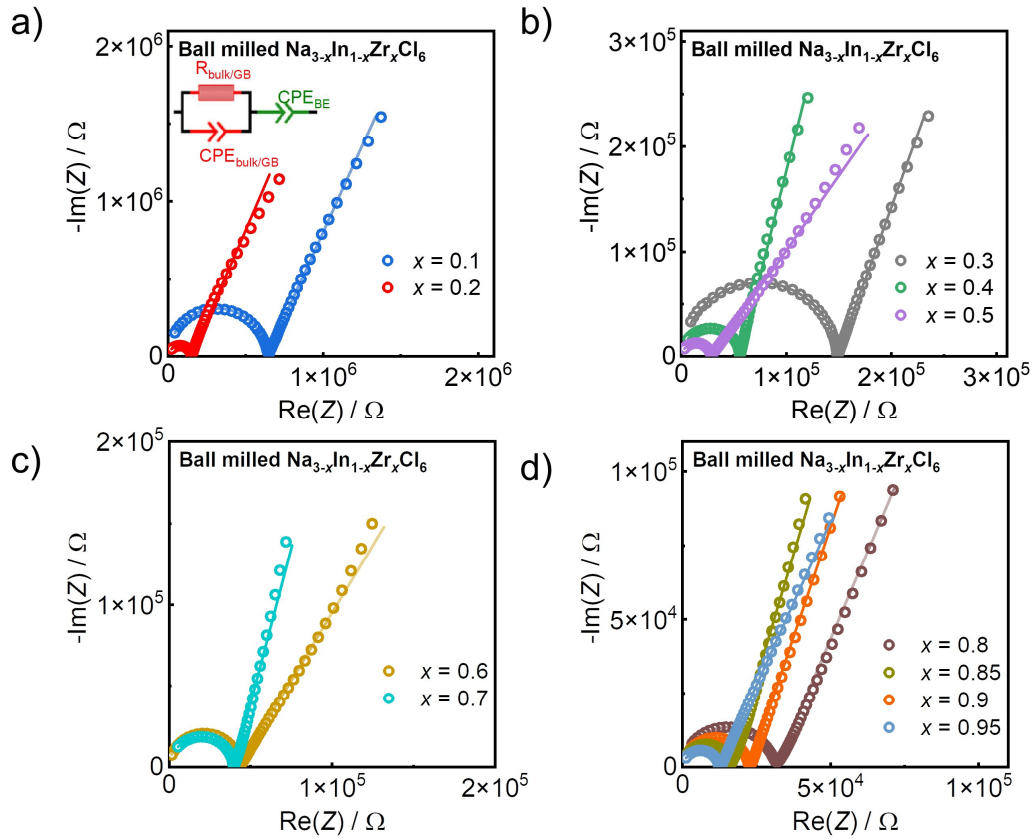

**Fig. S8.** **a)** Nyquist plots of ball milled  $\text{Na}_{3-x}\text{In}_{1-x}\text{Zr}_x\text{Cl}_6$  ( $x = 0.1; 0.2$ ). Inset: equivalent circuit model used for fitting the measured impedance spectra. **b)** Nyquist plots of ball milled  $\text{Na}_{3-x}\text{In}_{1-x}\text{Zr}_x\text{Cl}_6$  ( $x = 0.3; 0.4; 0.5$ ). **c)** Nyquist plots of ball milled  $\text{Na}_{3-x}\text{In}_{1-x}\text{Zr}_x\text{Cl}_6$  ( $x = 0.6; 0.7$ ). **d)** Nyquist plots of ball milled  $\text{Na}_{3-x}\text{In}_{1-x}\text{Zr}_x\text{Cl}_6$  ( $x = 0.8; 0.85; 0.9; 0.95$ ). These impedances were measured at room temperature (25 °C).

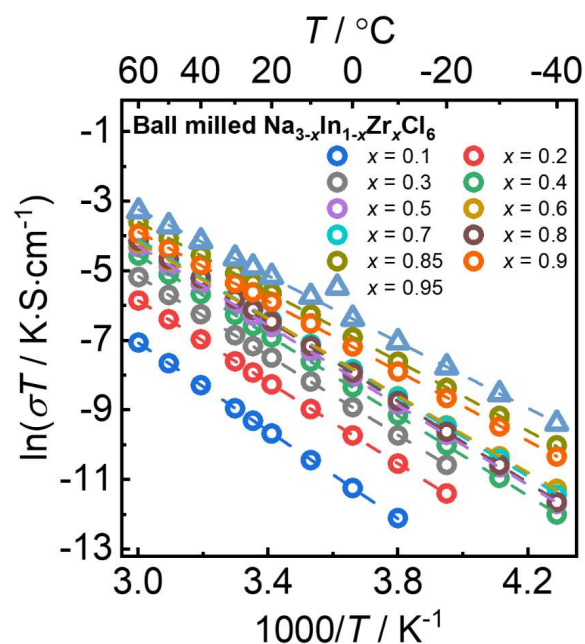

**Fig. S9.** Arrhenius plots from the temperature dependent impedance of ball milled  $\text{Na}_{3-x}\text{In}_{1-x}\text{Zr}_x\text{Cl}_6$  series.

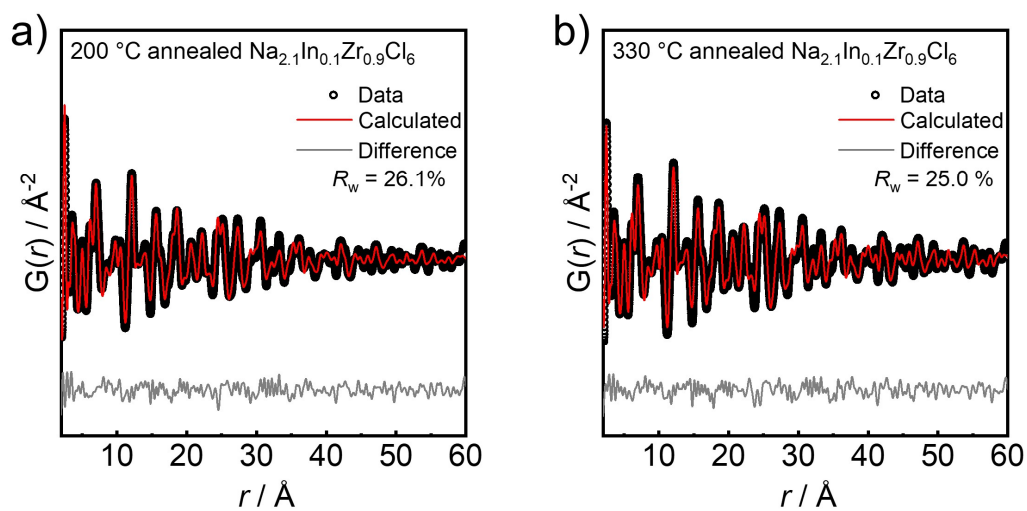

**Fig. S10.** Summary of pair distribution function fitting results of  $\text{Na}_{2.1}\text{In}_{0.1}\text{Zr}_{0.9}\text{Cl}_6$  annealed at **a)** 200 °C and **b)** 330 °C for 1 hour.

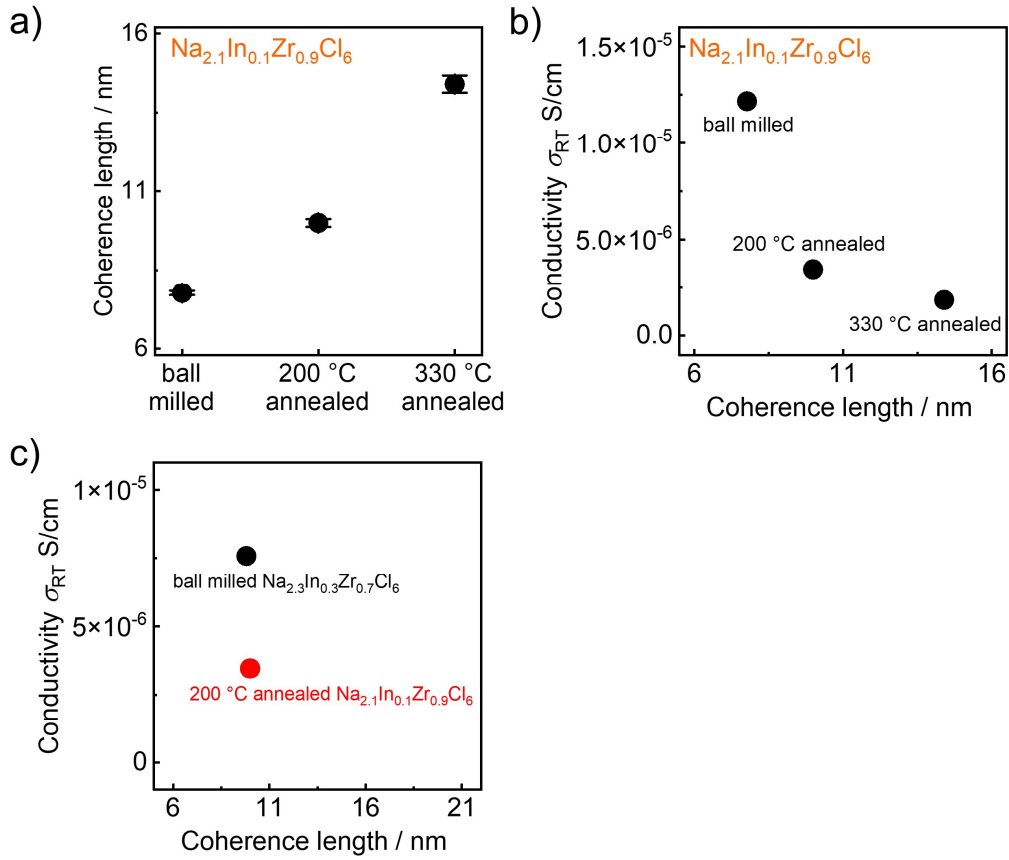

**Fig. S11.** **a)** Coherence lengths of ball milled, 200 °C annealed and 330 °C annealed Na<sub>2.1</sub>In<sub>0.1</sub>Zr<sub>0.9</sub>Cl<sub>6</sub>. The uncertainties, where shown, correspond to 1 $\sigma$ . **b)** Room-temperature ionic conductivities of Na<sub>2.1</sub>In<sub>0.1</sub>Zr<sub>0.9</sub>Cl<sub>6</sub> synthesized by different procedures against coherence length. **c)** Room-temperature ionic conductivities of 200 °C annealed Na<sub>2.1</sub>In<sub>0.1</sub>Zr<sub>0.9</sub>Cl<sub>6</sub> and ball milled Na<sub>2.3</sub>In<sub>0.3</sub>Zr<sub>0.7</sub>Cl<sub>6</sub> against coherence length. The ionic conductivities of annealed Na<sub>2.1</sub>In<sub>0.1</sub>Zr<sub>0.9</sub>Cl<sub>6</sub> were extracted from Ref. 31.

**Table S1:** Used constraints for pair distribution function fitting of ball milled Na<sub>3-x</sub>In<sub>1-x</sub>Zr<sub>x</sub>Cl<sub>6</sub>.

| Na <sub>3-x</sub> In <sub>1-x</sub> Zr <sub>x</sub> Cl <sub>6</sub> |                  |                    |       |       |                        |                          |
|---------------------------------------------------------------------|------------------|--------------------|-------|-------|------------------------|--------------------------|
| Lattice Parameter: $a = \gamma = 90^\circ$                          |                  |                    |       |       |                        |                          |
| Space group: $P2_1/n$                                               |                  |                    |       |       |                        |                          |
| Atom                                                                | Wyckoff Position | Atomic coordinates |       |       | Occ.                   | $U_{iso} / \text{\AA}^2$ |
|                                                                     |                  | $x$                | $y$   | $z$   |                        |                          |
| Na1                                                                 | 4e               | Pos1               | Pos2  | Pos3  | $(3-x-\text{OccNa})/2$ | Th1                      |
| Na2                                                                 | 2b               | 0                  | 0     | 0.5   | OccNa                  | Th1                      |
| Zr1                                                                 | 2a               | 0                  | 0     | 0     | $x$                    | Th2                      |
| In1                                                                 | 2a               | 0                  | 0     | 0     | $1-x$                  | Th2                      |
| Cl1                                                                 | 4e               | Pos4               | Pos5  | Pos6  | 1                      | Th3                      |
| Cl2                                                                 | 4e               | Pos7               | Pos8  | Pos9  | 1                      | Th3                      |
| Cl3                                                                 | 4e               | Pos10              | Pos11 | Pos12 | 1                      | Th3                      |

**Table S2:** Pair distribution function fitting result of ball milled Na<sub>2.9</sub>In<sub>0.9</sub>Zr<sub>0.1</sub>Cl<sub>6</sub>. Fitting range: 2 - 60  $\text{\AA}$ .

| Na <sub>2.9</sub> In <sub>0.9</sub> Zr <sub>0.1</sub> Cl <sub>6</sub>                                                                 |         |                    |  |                          |
|---------------------------------------------------------------------------------------------------------------------------------------|---------|--------------------|--|--------------------------|
| Lattice Parameter: $a = 6.7631(5) \text{\AA}$ , $b = 7.1722(7) \text{\AA}$ , $c = 9.9708(10) \text{\AA}$ , $\beta = 90.537(13)^\circ$ |         |                    |  |                          |
| Space group: $P2_1/n$                                                                                                                 |         |                    |  |                          |
| Atom                                                                                                                                  | Wyckoff | Atomic coordinates |  | $U_{iso} / \text{\AA}^2$ |



|     | Position | x          | y          | z          |           |           |
|-----|----------|------------|------------|------------|-----------|-----------|
| Na1 | 4e       | 0.506(2)   | -0.0752(7) | 0.2474(11) | 0.967(11) | 0.062(2)  |
| Na2 | 2b       | 0          | 0          | 0.5        | 0.98(3)   | 0.062(2)  |
| Zr1 | 2a       | 0          | 0          | 0          | 0.09(2)   | 0.0184(4) |
| In1 | 2a       | 0          | 0          | 0          | 0.91(2)   | 0.0184(4) |
| Cl1 | 4e       | 0.1610(8)  | 0.3082(6)  | -0.0765(6) | 1         | 0.0433(7) |
| Cl2 | 4e       | 0.1339(6)  | 0.0537(6)  | 0.2327(6)  | 1         | 0.0433(7) |
| Cl3 | 4e       | -0.3071(6) | 0.1724(7)  | 0.0536(5)  | 1         | 0.0433(7) |

**Table S3:** Pair distribution function fitting result of ball milled  $\text{Na}_{2.8}\text{In}_{0.8}\text{Zr}_{0.2}\text{Cl}_6$ . Fitting range: 2 - 60 Å.

| $\text{Na}_{2.8}\text{In}_{0.8}\text{Zr}_{0.2}\text{Cl}_6$                                              |                  |                    |            |            |           |                               |
|---------------------------------------------------------------------------------------------------------|------------------|--------------------|------------|------------|-----------|-------------------------------|
| Lattice Parameter: $a = 6.7598(5)$ Å, $b = 7.1698(7)$ Å, $c = 9.9693(10)$ Å, $\beta = 90.631(13)^\circ$ |                  |                    |            |            |           |                               |
| Space group: $P2_1/n$                                                                                   |                  |                    |            |            |           |                               |
| Atom                                                                                                    | Wyckoff Position | Atomic coordinates |            |            | Occ.      | $U_{\text{iso}} / \text{Å}^2$ |
|                                                                                                         |                  | x                  | y          | z          |           |                               |
| Na1                                                                                                     | 4e               | 0.507(2)           | -0.0767(7) | 0.2480(11) | 0.947(10) | 0.067(2)                      |
| Na2                                                                                                     | 2b               | 0                  | 0          | 0.5        | 0.90(3)   | 0.067(2)                      |
| Zr1                                                                                                     | 2a               | 0                  | 0          | 0          | 0.20(2)   | 0.0201(4)                     |
| In1                                                                                                     | 2a               | 0                  | 0          | 0          | 0.80(2)   | 0.0201(4)                     |
| Cl1                                                                                                     | 4e               | 0.1607(8)          | 0.3072(6)  | -0.0770(6) | 1         | 0.0457(7)                     |
| Cl2                                                                                                     | 4e               | 0.1324(6)          | 0.0517(6)  | 0.2324(6)  | 1         | 0.0457(7)                     |
| Cl3                                                                                                     | 4e               | -0.3064(7)         | 0.1727(7)  | 0.0523(5)  | 1         | 0.0457(7)                     |

**Table S4:** Pair distribution function fitting result of ball milled  $\text{Na}_{2.7}\text{In}_{0.7}\text{Zr}_{0.3}\text{Cl}_6$ . Fitting range: 2 - 60 Å.

| $\text{Na}_{2.7}\text{In}_{0.7}\text{Zr}_{0.3}\text{Cl}_6$                                              |                  |                    |            |            |           |                               |
|---------------------------------------------------------------------------------------------------------|------------------|--------------------|------------|------------|-----------|-------------------------------|
| Lattice Parameter: $a = 6.7563(6)$ Å, $b = 7.1656(8)$ Å, $c = 9.9670(11)$ Å, $\beta = 90.750(14)^\circ$ |                  |                    |            |            |           |                               |
| Space group: $P2_1/n$                                                                                   |                  |                    |            |            |           |                               |
| Atom                                                                                                    | Wyckoff Position | Atomic coordinates |            |            | Occ.      | $U_{\text{iso}} / \text{Å}^2$ |
|                                                                                                         |                  | x                  | y          | z          |           |                               |
| Na1                                                                                                     | 4e               | 0.507(2)           | -0.0783(8) | 0.2487(11) | 0.960(11) | 0.079(3)                      |
| Na2                                                                                                     | 2b               | 0                  | 0          | 0.5        | 0.78(3)   | 0.079(3)                      |
| Zr1                                                                                                     | 2a               | 0                  | 0          | 0          | 0.30(2)   | 0.0226(3)                     |
| In1                                                                                                     | 2a               | 0                  | 0          | 0          | 0.70(2)   | 0.0226(3)                     |
| Cl1                                                                                                     | 4e               | 0.1612(8)          | 0.3092(6)  | -0.0781(6) | 1         | 0.0472(4)                     |
| Cl2                                                                                                     | 4e               | 0.1328(7)          | 0.0507(6)  | 0.2350(5)  | 1         | 0.0472(4)                     |
| Cl3                                                                                                     | 4e               | -0.3023(3)         | 0.1736(4)  | 0.0523(4)  | 1         | 0.0472(4)                     |

**Table S5:** Pair distribution function fitting result of ball milled  $\text{Na}_{2.6}\text{In}_{0.6}\text{Zr}_{0.4}\text{Cl}_6$ . Fitting range: 2 - 60 Å.

| $\text{Na}_{2.6}\text{In}_{0.6}\text{Zr}_{0.4}\text{Cl}_6$                                            |                  |                    |            |            |           |                               |
|-------------------------------------------------------------------------------------------------------|------------------|--------------------|------------|------------|-----------|-------------------------------|
| Lattice Parameter: $a = 6.7529(7)$ Å, $b = 7.1611(9)$ Å, $c = 9.9609(13)$ Å, $\beta = 90.88(2)^\circ$ |                  |                    |            |            |           |                               |
| Space group: $P2_1/n$                                                                                 |                  |                    |            |            |           |                               |
| Atom                                                                                                  | Wyckoff Position | Atomic coordinates |            |            | Occ.      | $U_{\text{iso}} / \text{Å}^2$ |
|                                                                                                       |                  | x                  | y          | z          |           |                               |
| Na1                                                                                                   | 4e               | 0.508(2)           | -0.0774(8) | 0.2437(13) | 0.927(11) | 0.083(3)                      |
| Na2                                                                                                   | 2b               | 0                  | 0          | 0.5        | 0.73(3)   | 0.083(3)                      |
| Zr1                                                                                                   | 2a               | 0                  | 0          | 0          | 0.42(2)   | 0.0254(6)                     |
| In1                                                                                                   | 2a               | 0                  | 0          | 0          | 0.58(2)   | 0.0254(6)                     |
| Cl1                                                                                                   | 4e               | 0.1619(9)          | 0.3064(6)  | -0.0797(6) | 1         | 0.0517(8)                     |
| Cl2                                                                                                   | 4e               | 0.1306(7)          | 0.0483(7)  | 0.2323(6)  | 1         | 0.0517(8)                     |
| Cl3                                                                                                   | 4e               | -0.3044(7)         | 0.1743(4)  | 0.0510(5)  | 1         | 0.0517(8)                     |

**Table S6:** Pair distribution function fitting result of ball milled  $\text{Na}_{2.5}\text{In}_{0.5}\text{Zr}_{0.5}\text{Cl}_6$ . Fitting range: 2 - 60 Å.

| $\text{Na}_{2.5}\text{In}_{0.5}\text{Zr}_{0.5}\text{Cl}_6$ |  |  |  |  |  |  |
|------------------------------------------------------------|--|--|--|--|--|--|
|------------------------------------------------------------|--|--|--|--|--|--|

Lattice Parameter:  $a = 6.7463(7) \text{ \AA}$ ,  $b = 7.1544(11) \text{ \AA}$ ,  $c = 9.952(2) \text{ \AA}$ ,  $\beta = 91.05(2)^\circ$   
Space group:  $P2_1/n$

| Atom | Wyckoff Position | Atomic coordinates |            |            | Occ.      | $U_{\text{iso}} / \text{\AA}^2$ |
|------|------------------|--------------------|------------|------------|-----------|---------------------------------|
|      |                  | $x$                | $y$        | $z$        |           |                                 |
| Na1  | 4e               | 0.511(2)           | -0.0792(8) | 0.2516(13) | 0.924(11) | 0.091(4)                        |
| Na2  | 2b               | 0                  | 0          | 0.5        | 0.65(3)   | 0.091(4)                        |
| Zr1  | 2a               | 0                  | 0          | 0          | 0.50(2)   | 0.0287(6)                       |
| In1  | 2a               | 0                  | 0          | 0          | 0.50(2)   | 0.0287(6)                       |
| Cl1  | 4e               | 0.1649(9)          | 0.3080(7)  | -0.0793(7) | 1         | 0.0572(9)                       |
| Cl2  | 4e               | 0.1287(8)          | 0.0464(7)  | 0.2319(6)  | 1         | 0.0572(9)                       |
| Cl3  | 4e               | -0.3035(7)         | 0.1741(8)  | 0.0500(5)  | 1         | 0.0572(9)                       |

**Table S7:** Pair distribution function fitting result of ball milled  $\text{Na}_{2.4}\text{In}_{0.4}\text{Zr}_{0.6}\text{Cl}_6$ . Fitting range: 2 - 60  $\text{\AA}$ .

**Na<sub>2.4</sub>In<sub>0.4</sub>Zr<sub>0.6</sub>Cl<sub>6</sub>**  
Lattice Parameter:  $a = 6.7395(8) \text{ \AA}$ ,  $b = 7.1475(11) \text{ \AA}$ ,  $c = 9.937(2) \text{ \AA}$ ,  $\beta = 91.24(2)^\circ$   
Space group:  $P2_1/n$

| Atom | Wyckoff Position | Atomic coordinates |            |            | Occ.      | $U_{\text{iso}} / \text{\AA}^2$ |
|------|------------------|--------------------|------------|------------|-----------|---------------------------------|
|      |                  | $x$                | $y$        | $z$        |           |                                 |
| Na1  | 4e               | 0.515(2)           | -0.0797(9) | 0.2439(12) | 0.932(11) | 0.092(4)                        |
| Na2  | 2b               | 0                  | 0          | 0.5        | 0.52(3)   | 0.092(4)                        |
| Zr1  | 2a               | 0                  | 0          | 0          | 0.62(2)   | 0.0287(6)                       |
| In1  | 2a               | 0                  | 0          | 0          | 0.38(2)   | 0.0287(6)                       |
| Cl1  | 4e               | 0.1648(8)          | 0.3043(6)  | -0.0799(6) | 1         | 0.0573(9)                       |
| Cl2  | 4e               | 0.1279(8)          | 0.0459(7)  | 0.2329(6)  | 1         | 0.0573(9)                       |
| Cl3  | 4e               | -0.3018(7)         | 0.1765(8)  | 0.0514(5)  | 1         | 0.0573(9)                       |

**Table S8:** Pair distribution function fitting result of ball milled  $\text{Na}_{2.3}\text{In}_{0.3}\text{Zr}_{0.7}\text{Cl}_6$ . Fitting range: 2 - 60  $\text{\AA}$ .

**Na<sub>2.3</sub>In<sub>0.3</sub>Zr<sub>0.7</sub>Cl<sub>6</sub>**  
Lattice Parameter:  $a = 6.7308(9) \text{ \AA}$ ,  $b = 7.1387(11) \text{ \AA}$ ,  $c = 9.918(2) \text{ \AA}$ ,  $\beta = 91.51(2)^\circ$   
Space group:  $P2_1/n$

| Atom | Wyckoff Position | Atomic coordinates |            |            | Occ.      | $U_{\text{iso}} / \text{\AA}^2$ |
|------|------------------|--------------------|------------|------------|-----------|---------------------------------|
|      |                  | $x$                | $y$        | $z$        |           |                                 |
| Na1  | 4e               | 0.517(2)           | -0.0813(9) | 0.2461(12) | 0.932(11) | 0.094(4)                        |
| Na2  | 2b               | 0                  | 0          | 0.5        | 0.44(3)   | 0.094(4)                        |
| Zr1  | 2a               | 0                  | 0          | 0          | 0.70(2)   | 0.02862(13)                     |
| In1  | 2a               | 0                  | 0          | 0          | 0.30(2)   | 0.02862(13)                     |
| Cl1  | 4e               | 0.1671(9)          | 0.3023(7)  | -0.0784(6) | 1         | 0.05863(14)                     |
| Cl2  | 4e               | 0.1286(9)          | 0.0461(7)  | 0.2357(4)  | 1         | 0.05863(14)                     |
| Cl3  | 4e               | -0.2996(3)         | 0.1742(4)  | 0.0517(4)  | 1         | 0.05863(14)                     |

**Table S9:** Pair distribution function fitting result of ball milled  $\text{Na}_{2.2}\text{In}_{0.2}\text{Zr}_{0.8}\text{Cl}_6$ . Fitting range: 2 - 60  $\text{\AA}$ .

**Na<sub>2.2</sub>In<sub>0.2</sub>Zr<sub>0.8</sub>Cl<sub>6</sub>**  
Lattice Parameter:  $a = 6.7182(10) \text{ \AA}$ ,  $b = 7.1300(12) \text{ \AA}$ ,  $c = 9.894(2) \text{ \AA}$ ,  $\beta = 91.781(15)^\circ$   
Space group:  $P2_1/n$

| Atom | Wyckoff Position | Atomic coordinates |            |            | Occ.      | $U_{\text{iso}} / \text{\AA}^2$ |
|------|------------------|--------------------|------------|------------|-----------|---------------------------------|
|      |                  | $x$                | $y$        | $z$        |           |                                 |
| Na1  | 4e               | 0.520(2)           | -0.0863(9) | 0.2487(12) | 0.978(13) | 0.099(4)                        |
| Na2  | 2b               | 0                  | 0          | 0.5        | 0.24(3)   | 0.099(4)                        |
| Zr1  | 2a               | 0                  | 0          | 0          | 0.80(2)   | 0.0282(3)                       |
| In1  | 2a               | 0                  | 0          | 0          | 0.20(2)   | 0.0282(3)                       |
| Cl1  | 4e               | 0.1733(9)          | 0.3012(7)  | -0.0759(7) | 1         | 0.0587(3)                       |
| Cl2  | 4e               | 0.1319(10)         | 0.0440(7)  | 0.2367(5)  | 1         | 0.0587(3)                       |
| Cl3  | 4e               | -0.2985(1)         | 0.1749(3)  | 0.0522(4)  | 1         | 0.0587(3)                       |

**Table S10:** Pair distribution function fitting result of ball milled  $\text{Na}_{2.15}\text{In}_{0.15}\text{Zr}_{0.85}\text{Cl}_6$ . Fitting

range: 2 - 60 Å.

**Na<sub>2.15</sub>In<sub>0.15</sub>Zr<sub>0.85</sub>Cl<sub>6</sub>**

Lattice Parameter:  $a = 6.710(2)$  Å,  $b = 7.121(2)$  Å,  $c = 9.883(3)$  Å,  $\beta = 91.91(2)^\circ$

Space group:  $P2_1/n$

| Atom | Wyckoff Position | Atomic coordinates |             |             | Occ.    | $U_{\text{iso}} / \text{Å}^2$ |
|------|------------------|--------------------|-------------|-------------|---------|-------------------------------|
|      |                  | $x$                | $y$         | $z$         |         |                               |
| Na1  | 4e               | 0.513(3)           | -0.0814(13) | 0.247(2)    | 0.95(2) | 0.100(6)                      |
| Na2  | 2b               | 0                  | 0           | 0.5         | 0.25(2) | 0.100(6)                      |
| Zr1  | 2a               | 0                  | 0           | 0           | 0.85(3) | 0.0288(7)                     |
| In1  | 2a               | 0                  | 0           | 0           | 0.15(3) | 0.0288(7)                     |
| Cl1  | 4e               | 0.1576(12)         | 0.2993(10)  | -0.0797(10) | 1       | 0.0599(9)                     |
| Cl2  | 4e               | 0.1306(10)         | 0.0446(10)  | 0.2290(3)   | 1       | 0.0599(9)                     |
| Cl3  | 4e               | -0.3061(9)         | 0.1918(12)  | 0.0497(8)   | 1       | 0.0599(9)                     |

**Table S11:** Pair distribution function fitting result of ball milled Na<sub>2.1</sub>In<sub>0.1</sub>Zr<sub>0.9</sub>Cl<sub>6</sub>. Fitting range: 2 - 60 Å.

**Na<sub>2.1</sub>In<sub>0.1</sub>Zr<sub>0.9</sub>Cl<sub>6</sub>**

Lattice Parameter:  $a = 6.7067(14)$  Å,  $b = 7.116(2)$  Å,  $c = 9.873(2)$  Å,  $\beta = 92.05(2)^\circ$

Space group:  $P2_1/n$

| Atom | Wyckoff Position | Atomic coordinates |             |            | Occ.    | $U_{\text{iso}} / \text{Å}^2$ |
|------|------------------|--------------------|-------------|------------|---------|-------------------------------|
|      |                  | $x$                | $y$         | $z$        |         |                               |
| Na1  | 4e               | 0.498(2)           | -0.0690(13) | 0.2142(13) | 0.96(2) | 0.100(5)                      |
| Na2  | 2b               | 0                  | 0           | 0.5        | 0.18(4) | 0.100(5)                      |
| Zr1  | 2a               | 0                  | 0           | 0          | 0.90(3) | 0.0300(10)                    |
| In1  | 2a               | 0                  | 0           | 0          | 0.10(3) | 0.0300(10)                    |
| Cl1  | 4e               | 0.1664(10)         | 0.2967(8)   | -0.0761(8) | 1       | 0.0636(11)                    |
| Cl2  | 4e               | 0.1290(9)          | 0.0474(9)   | 0.2315(4)  | 1       | 0.0636(11)                    |
| Cl3  | 4e               | -0.3030(8)         | 0.1834(11)  | 0.0539(6)  | 1       | 0.0636(11)                    |

**Table S12:** Pair distribution function fitting result of ball milled Na<sub>2.5</sub>In<sub>0.5</sub>Zr<sub>0.5</sub>Cl<sub>6</sub>. Fitting range: 2 - 20 Å.

**Na<sub>2.5</sub>In<sub>0.5</sub>Zr<sub>0.5</sub>Cl<sub>6</sub>**

Lattice Parameter:  $a = 6.746(3)$  Å,  $b = 7.150(3)$  Å,  $c = 9.952(6)$  Å,  $\beta = 91.17(7)^\circ$

Space group:  $P2_1/n$

| Atom | Wyckoff Position | Atomic coordinates |             |             | Occ.    | $U_{\text{iso}} / \text{Å}^2$ |
|------|------------------|--------------------|-------------|-------------|---------|-------------------------------|
|      |                  | $x$                | $y$         | $z$         |         |                               |
| Na1  | 4e               | 0.515(2)           | -0.0817(10) | 0.259(2)    | 1.00(2) | 0.075(5)                      |
| Na2  | 2b               | 0                  | 0           | 0.5         | 0.48(5) | 0.075(5)                      |
| Zr1  | 2a               | 0                  | 0           | 0           | 0.52(3) | 0.027(2)                      |
| In1  | 2a               | 0                  | 0           | 0           | 0.48(3) | 0.027(2)                      |
| Cl1  | 4e               | 0.1642(14)         | 0.3157(12)  | -0.0845(11) | 1       | 0.055(2)                      |
| Cl2  | 4e               | 0.126(2)           | 0.0429(13)  | 0.2333(7)   | 1       | 0.055(2)                      |
| Cl3  | 4e               | -0.3019(4)         | 0.177(2)    | 0.052(2)    | 1       | 0.055(2)                      |

**Table S13:** Pair distribution function fitting result of ball milled Na<sub>2.5</sub>In<sub>0.5</sub>Zr<sub>0.5</sub>Cl<sub>6</sub>. Fitting range: 2 - 40 Å.

**Na<sub>2.5</sub>In<sub>0.5</sub>Zr<sub>0.5</sub>Cl<sub>6</sub>**

Lattice Parameter:  $a = 6.7472(11)$  Å,  $b = 7.156(2)$  Å,  $c = 9.952(2)$  Å,  $\beta = 91.18(2)^\circ$

Space group:  $P2_1/n$

| Atom | Wyckoff Position | Atomic coordinates |            |            | Occ.      | $U_{\text{iso}} / \text{Å}^2$ |
|------|------------------|--------------------|------------|------------|-----------|-------------------------------|
|      |                  | $x$                | $y$        | $z$        |           |                               |
| Na1  | 4e               | 0.514(2)           | -0.0840(9) | 0.2584(12) | 0.946(13) | 0.074(4)                      |
| Na2  | 2b               | 0                  | 0          | 0.5        | 0.58(4)   | 0.074(4)                      |
| Zr1  | 2a               | 0                  | 0          | 0          | 0.52(3)   | 0.0262(6)                     |
| In1  | 2a               | 0                  | 0          | 0          | 0.48(3)   | 0.0262(6)                     |
| Cl1  | 4e               | 0.1678(10)         | 0.3107(8)  | -0.0838(8) | 1         | 0.0543(9)                     |
| Cl2  | 4e               | 0.1287(9)          | 0.0417(8)  | 0.2321(6)  | 1         | 0.0543(9)                     |
| Cl3  | 4e               | -0.3039(6)         | 0.1745(9)  | 0.0500(6)  | 1         | 0.0543(9)                     |

**Table S14.** Fitted parameters of room-temperature impedance spectra of ball milled  $\text{Na}_{3-x}\text{In}_{1-x}\text{Zr}_x\text{Cl}_6$ , where  $x$  represents nominal Zr content;  $R_{\text{bulk/GB}}$  and  $\text{CPE}_{\text{bulk/GB}}$  represent the resistance and CPE capacitance of  $\text{Na}_{3-x}\text{In}_{1-x}\text{Zr}_x\text{Cl}_6$  pellets respectively;  $\alpha_{\text{bulk/GB}}$  is the ideal indicator of  $\text{CPE}_{\text{bulk/GB}}$ ;  $\text{CPE}_{\text{BE}}$  represent the CPE capacitance of blocking electrode;  $\alpha_{\text{BE}}$  is the ideal indicator of  $\text{CPE}_{\text{BE}}$ .

| $x$ in $\text{Na}_{3-x}\text{In}_{1-x}\text{Zr}_x\text{Cl}_6$ | $R_{\text{bulk/GB}}$ | $\text{CPE}_{\text{bulk/GB}}$ | $\alpha_{\text{bulk/GB}}$ | $\text{CPE}_{\text{BE}}$ | $\alpha_{\text{BE}}$ |
|---------------------------------------------------------------|----------------------|-------------------------------|---------------------------|--------------------------|----------------------|
| 0.1                                                           | $6.37 \times 10^5$   | $7.56 \times 10^{-11}$        | 0.98                      | $7.37 \times 10^{-7}$    | 0.73                 |
| 0.2                                                           | $1.46 \times 10^5$   | $4.33 \times 10^{-11}$        | 0.97                      | $4.43 \times 10^{-7}$    | 0.74                 |
| 0.3                                                           | $1.48 \times 10^5$   | $3.75 \times 10^{-11}$        | 0.97                      | $5.90 \times 10^{-6}$    | 0.78                 |
| 0.4                                                           | $5.56 \times 10^4$   | $5.00 \times 10^{-11}$        | 0.98                      | $2.07 \times 10^{-6}$    | 0.84                 |
| 0.5                                                           | $2.81 \times 10^4$   | $8.04 \times 10^{-11}$        | 0.94                      | $2.42 \times 10^{-6}$    | 0.61                 |
| 0.6                                                           | $4.32 \times 10^4$   | $5.79 \times 10^{-11}$        | 0.97                      | $2.59 \times 10^{-6}$    | 0.66                 |
| 0.7                                                           | $3.97 \times 10^4$   | $4.06 \times 10^{-11}$        | 0.96                      | $2.52 \times 10^{-6}$    | 0.84                 |
| 0.8                                                           | $3.18 \times 10^4$   | $2.17 \times 10^{-10}$        | 0.88                      | $1.38 \times 10^{-6}$    | 0.75                 |
| 0.85                                                          | $1.61 \times 10^4$   | $1.11 \times 10^{-10}$        | 0.97                      | $5.51 \times 10^{-6}$    | 0.82                 |
| 0.9                                                           | $2.27 \times 10^4$   | $9.56 \times 10^{-11}$        | 0.91                      | $2.10 \times 10^{-6}$    | 0.79                 |
| 0.95                                                          | $1.25 \times 10^4$   | $8.88 \times 10^{-11}$        | 0.93                      | $4.73 \times 10^{-6}$    | 0.73                 |

**Table S15:** Pair distribution function fitting result of 200 °C annealed  $\text{Na}_{2.1}\text{In}_{0.1}\text{Zr}_{0.9}\text{Cl}_6$ . Fitting range: 2 - 60 Å.

| $\text{Na}_{2.1}\text{In}_{0.1}\text{Zr}_{0.9}\text{Cl}_6$                                              |                  |                    |             |            |           |                               |
|---------------------------------------------------------------------------------------------------------|------------------|--------------------|-------------|------------|-----------|-------------------------------|
| Lattice Parameter: $a = 6.7117(11)$ Å, $b = 7.1204(12)$ Å, $c = 9.880(2)$ Å, $\beta = 91.907(14)^\circ$ |                  |                    |             |            |           |                               |
| Space group: $P2_1/n$                                                                                   |                  |                    |             |            |           |                               |
| Atom                                                                                                    | Wyckoff Position | Atomic coordinates |             |            | Occ.      | $U_{\text{iso}} / \text{Å}^2$ |
|                                                                                                         |                  | $x$                | $y$         | $z$        |           |                               |
| Na1                                                                                                     | 4e               | 0.505(2)           | -0.0757(12) | 0.2256(15) | 0.949(15) | 0.100(5)                      |
| Na2                                                                                                     | 2b               | 0                  | 0           | 0.5        | 0.19(4)   | 0.100(5)                      |
| Zr1                                                                                                     | 2a               | 0                  | 0           | 0          | 0.91(3)   | 0.0216(8)                     |
| In1                                                                                                     | 2a               | 0                  | 0           | 0          | 0.09(3)   | 0.0216(8)                     |
| Cl1                                                                                                     | 4e               | 0.1693(10)         | 0.2984(8)   | -0.0782(8) | 1         | 0.0216(8)                     |
| Cl2                                                                                                     | 4e               | 0.1285(9)          | 0.0470(9)   | 0.2315(4)  | 1         | 0.0566(10)                    |
| Cl3                                                                                                     | 4e               | -0.3044(8)         | 0.1858(10)  | 0.0525(6)  | 1         | 0.0566(10)                    |

**Table S16:** Pair distribution function fitting result of 330 °C annealed  $\text{Na}_{2.1}\text{In}_{0.1}\text{Zr}_{0.9}\text{Cl}_6$ . Fitting range: 2 - 60 Å.

| $\text{Na}_{2.1}\text{In}_{0.1}\text{Zr}_{0.9}\text{Cl}_6$                                              |                  |                    |             |            |           |                               |
|---------------------------------------------------------------------------------------------------------|------------------|--------------------|-------------|------------|-----------|-------------------------------|
| Lattice Parameter: $a = 6.7058(9)$ Å, $b = 7.1113(9)$ Å, $c = 9.8744(12)$ Å, $\beta = 91.908(10)^\circ$ |                  |                    |             |            |           |                               |
| Space group: $P2_1/n$                                                                                   |                  |                    |             |            |           |                               |
| Atom                                                                                                    | Wyckoff Position | Atomic coordinates |             |            | Occ.      | $U_{\text{iso}} / \text{Å}^2$ |
|                                                                                                         |                  | $x$                | $y$         | $z$        |           |                               |
| Na1                                                                                                     | 4e               | 0.511(2)           | -0.0853(10) | 0.2451(13) | 0.955(14) | 0.090(4)                      |
| Na2                                                                                                     | 2b               | 0                  | 0           | 0.5        | 0.20(4)   | 0.090(4)                      |
| Zr1                                                                                                     | 2a               | 0                  | 0           | 0          | 0.89(3)   | 0.0205(7)                     |
| In1                                                                                                     | 2a               | 0                  | 0           | 0          | 0.11(3)   | 0.0205(7)                     |
| Cl1                                                                                                     | 4e               | 0.1692(8)          | 0.2990(6)   | -0.0722(6) | 1         | 0.0452(8)                     |
| Cl2                                                                                                     | 4e               | 0.1266(8)          | 0.0424(7)   | 0.2289(3)  | 1         | 0.0452(8)                     |
| Cl3                                                                                                     | 4e               | -0.3098(7)         | 0.1821(8)   | 0.0532(5)  | 1         | 0.0452(8)                     |

The uncertainties shown in the tables correspond to  $1\sigma$ .
